# Supplementary material for: Micrococcus porci sp. nov., Isolated from Feces of Black Pig (Sus scrofa)
Source: MDPI journal article supplement (doi:10.3390/life12111749), 2022-10-31
Supplement: s1 [file s1]

Supplementary Table S1. The novel protein clusters of *Micrococcus porci* sp. nov. KD337-16<sup>T</sup>

| Cluster name | Protein number | Swiss-Prot Hit | GO annotation                                                                           |
|--------------|----------------|----------------|-----------------------------------------------------------------------------------------|
| cluster38    | 4              | P69927         | P:response to antibiotic; IEA:UniProtKB-KW KD33716 LOCUS_06850;KD33716                  |
| cluster40    | 4              | N/A            | N/A                                                                                     |
| cluster531   | 3              | N/A            | N/A                                                                                     |
| cluster1785  | 2              | N/A            | N/A                                                                                     |
| cluster1786  | 2              | N/A            | N/A                                                                                     |
| cluster1787  | 2              | N/A            | N/A                                                                                     |
| cluster1788  | 2              | O07434         | GO:0046688; P:response to copper ion; IDA:MTBBASE                                       |
| cluster1789  | 2              | Q6AHI5         | GO:0015103; F:inorganic anion transmembrane transporter activity; IEA:UniProtKB-UniRule |
| cluster1790  | 2              | N/A            | N/A                                                                                     |
| cluster1791  | 2              | Q5SKN9         | GO:0046872; F:metal ion binding; IEA:UniProtKB-KW                                       |
| cluster1792  | 2              | P16898         | GO:0046677; P:response to antibiotic; IEA:UniProtKB-KW                                  |
| cluster1793  | 2              | N/A            | N/A                                                                                     |
| cluster1794  | 2              | Q4WZ69         | GO:0035837; P:ergot alkaloid biosynthetic process                                       |
| cluster1795  | 2              | N/A            | N/A                                                                                     |
| cluster1796  | 2              | N/A            | N/A                                                                                     |
| cluster1797  | 2              | N/A            | N/A                                                                                     |
| cluster1798  | 2              | N/A            | N/A                                                                                     |
| cluster1799  | 2              | N/A            | N/A                                                                                     |
| cluster1800  | 2              | Q829X3         | GO:0009432; P:SOS response; IEA:UniProtKB-UniRule                                       |
| cluster1801  | 2              | N/A            | N/A                                                                                     |
| cluster1802  | 2              | N/A            | N/A                                                                                     |
| cluster1803  | 2              | O00087         | GO:0019464; P:glycine decarboxylation via glycine cleavage system; ISO:PomBase          |
| cluster1804  | 2              | N/A            | N/A                                                                                     |
| cluster1805  | 2              | N/A            | N/A                                                                                     |
